# Supplementary material for: Upregulation of EGFR signaling is correlated with tumor stroma remodeling and tumor recurrence in FGFR1-driven breast cancer
Source: Springer Nature journal article supplement (doi:10.1186/s13058-015-0649-1), 2015-11-18
Supplement: MOESM1 [file 9781588]

Supplementary Table 1: List of Antibodies and Reagents

| Antibody/Reagents   | Application | Manufacturer                       | Catalog#   |
|---------------------|-------------|------------------------------------|------------|
| BrdU-488            | IF          | Invitrogen                         | B35130     |
| p-Histone H3        | IF          | Upstate                            | 06-570     |
| Keratin 5           | IF          | Covance                            | PRB-160P   |
| Keratin 8           | IF          | Development Studies Hybridoma Bank | TROMA-I    |
| HA                  | IF          | Cell Signaling                     | 2367       |
| Ki67                | IF          | Vector Labs                        | VP-K451    |
| cc3                 | IF          | Cell Signaling                     | 9661       |
| S100A8              | IF          | R&D System                         | MAB3059    |
| SMA- $\alpha$       | IF          | Sigma                              | A2547      |
| Tenascin-C          | IF          | Millipore                          | AB19013    |
| CD31                | IF          | abcam                              | ab28364    |
| Areg                | IF          | Santa Cruz                         | sc-74501   |
| p-mTOR              | WB          | Cell Signaling                     | 2974       |
| p-4EBP1             | WB          | Cell Signaling                     | 2855       |
| $\beta$ -actin      | WB          | Abcam                              | ab8227     |
| p-EGFR (Y1068)      | WB          | Cell Signaling                     | 3777       |
| p-HER2              | WB          | Cell Signaling                     | 6942       |
| GR1                 | FACS        | BioLegend                          | 108407     |
| CD11b               | FACS        | abcam                              | ab8878     |
| Phosphatase         | WB          | Cell Signaling                     | 5872       |
| Protease inhibitors | WB          | Roche                              | 4693116001 |
